# Supplementary material for: A green solvent system for templated sequential deposition of stable formamidinium lead triiodide for perovskite solar cells
Source: Research Square preprint supplement (doi:10.21203/rs.3.rs-1135857/v1), 2024-09-30
Supplement: Supplementary file 1 [file c54f30b574fb5e85dc84d87e.pdf]

## Solar Cells Reporting Summary

Nature Portfolio wishes to improve the reproducibility of the work that we publish. This form is intended for publication with all accepted papers reporting the characterization of photovoltaic devices and provides structure for consistency and transparency in reporting. Some list items might not apply to an individual manuscript, but all fields must be completed for clarity.

For further information on Nature Research policies, including our [data availability policy](#), see [Authors & Referees](#).

### ► Experimental design

Please check the following details are reported in the manuscript, and provide a brief description or explanation where applicable.

#### 1. Dimensions

Area of the tested solar cells

☒ Yes  
☐ No

0.25 cm<sup>2</sup> and 1.00 cm<sup>2</sup>

*Explain why this information is not reported/not relevant.*

Method used to determine the device area

☒ Yes  
☐ No

Shadow mask area, measured by visible light microscopy

*Explain why this information is not reported/not relevant.*

#### 2. Current-voltage characterization

Current density-voltage (J-V) plots in both forward and backward direction

☒ Yes  
☐ No

Fig. 4; SI Fig. 14, SI Fig. 27

Voltage scan conditions

☒ Yes  
☐ No

Methods

*Explain why this information is not reported/not relevant.*

Test environment

☒ Yes  
☐ No

Methods

*Explain why this information is not reported/not relevant.*

Protocol for preconditioning of the device before its characterization

☒ Yes  
☐ No

Methods

*Explain why this information is not reported/not relevant.*

Stability of the J-V characteristic

☒ Yes  
☐ No

Fig. 4; SI Fig. 14, SI Fig. 27

*Explain why this information is not reported/not relevant.*

#### 3. Hysteresis or any other unusual behaviour

Description of the unusual behaviour observed during the characterization

☐ Yes  
☒ No

*Provide a description of hysteresis or any other unusual behaviour observed during the characterization.*

N/A

Related experimental data

☐ Yes  
☒ No

*Provide a description of the related experimental data.*

N/A

#### 4. Efficiency

External quantum efficiency (EQE) or incident photons to current efficiency (IPCE)

☒ Yes  
☐ No

Methods; SI Fig. 9

*Explain why this information is not reported/not relevant.*

A comparison between the integrated response under the standard reference spectrum and the response measure under the simulator

☒ Yes  
☐ No

SI Fig. 9

*Explain why this information is not reported/not relevant.*

|                                                                                                  |                                                                        |                                                                                                                                                         |
|--------------------------------------------------------------------------------------------------|------------------------------------------------------------------------|---------------------------------------------------------------------------------------------------------------------------------------------------------|
| For tandem solar cells, the bias illumination and bias voltage used for each subcell             | <input type="checkbox"/> Yes<br><input checked="" type="checkbox"/> No | <div>Provide a description of the measurement conditions.</div> <div>N/A</div>                                                                          |
| <b>5. Calibration</b>                                                                            |                                                                        |                                                                                                                                                         |
| Light source and reference cell or sensor used for the characterization                          | <input checked="" type="checkbox"/> Yes<br><input type="checkbox"/> No | <div>Methods</div> <div>Explain why this information is not reported/not relevant.</div>                                                                |
| Confirmation that the reference cell was calibrated and certified                                | <input checked="" type="checkbox"/> Yes<br><input type="checkbox"/> No | <div>Methods</div> <div>Explain why this information is not reported/not relevant.</div>                                                                |
| Calculation of spectral mismatch between the reference cell and the devices under test           | <input checked="" type="checkbox"/> Yes<br><input type="checkbox"/> No | <div>Methods</div> <div>Explain why this information is not reported/not relevant.</div>                                                                |
| <b>6. Mask/aperture</b>                                                                          |                                                                        |                                                                                                                                                         |
| Size of the mask/aperture used during testing                                                    | <input checked="" type="checkbox"/> Yes<br><input type="checkbox"/> No | <div>0.25 cm<sup>2</sup> and 1.00 cm<sup>2</sup></div> <div>Explain why this information is not reported/not relevant.</div>                            |
| Variation of the measured short-circuit current density with the mask/aperture area              | <input checked="" type="checkbox"/> Yes<br><input type="checkbox"/> No | <div>Fig. 4 and Methods</div> <div>Explain why this information is not reported/not relevant.</div>                                                     |
| <b>7. Performance certification</b>                                                              |                                                                        |                                                                                                                                                         |
| Identity of the independent certification laboratory that confirmed the photovoltaic performance | <input type="checkbox"/> Yes<br><input checked="" type="checkbox"/> No | <div>Identify the independent certification laboratory.</div> <div>Not certified</div>                                                                  |
| A copy of any certificate(s)                                                                     | <input type="checkbox"/> Yes<br><input checked="" type="checkbox"/> No | <div>Certificate copies should be provided in the Supplementary information. Please state the supplementary item number.</div> <div>Not certified</div> |
| <b>8. Statistics</b>                                                                             |                                                                        |                                                                                                                                                         |
| Number of solar cells tested                                                                     | <input checked="" type="checkbox"/> Yes<br><input type="checkbox"/> No | <div>Main text and figure captions</div> <div>Explain why this information is not reported/not relevant.</div>                                          |
| Statistical analysis of the device performance                                                   | <input checked="" type="checkbox"/> Yes<br><input type="checkbox"/> No | <div>Main text and figure captions</div> <div>Explain why this information is not reported/not relevant.</div>                                          |
| <b>9. Long-term stability analysis</b>                                                           |                                                                        |                                                                                                                                                         |
| Type of analysis, bias conditions and environmental conditions                                   | <input checked="" type="checkbox"/> Yes<br><input type="checkbox"/> No | <div>Described in full in the main text and SI.</div> <div>Explain why this information is not reported/not relevant.</div>                             |
